# Supplementary material for: Emerging Role of Decoy Receptor-2 as a Cancer Risk Predictor in Oral Potentially Malignant Disorders
Source: MDPI journal article supplement (doi:10.3390/ijms241814382), 2023-09-21
Supplement: s1 [file s1]

**SUPPLEMENTARY INFORMATION**

**Supplementary Table S1.** Evolution of the premalignant lesions in relation to histopathological diagnosis using WHO binary dysplasia grading.

| Characteristics                    | No. cases (%) | Progression to OSCC [No. cases (%)] | <i>p</i> |
|------------------------------------|---------------|-------------------------------------|----------|
| <i>Histopathological diagnosis</i> |               |                                     |          |
| Without dysplasia                  | 47 (78)       | 5 (11)                              | < 0.0001 |
| Low-grade dysplasia                | 5 (8)         | 3 (60)                              |          |
| High-grade dysplasia               | 3 (5)         | 3 (100)                             |          |

Chi-square test

**Supplementary Table S2.** Relationship between binary histological dysplasia grading and expression of Ki67, p16, DcR2 and DEC1.

| Protein expression                                           | Histological grade of epithelial dysplasia |                     |                      | <i>p</i> |
|--------------------------------------------------------------|--------------------------------------------|---------------------|----------------------|----------|
|                                                              | Absent                                     | Low-grade dysplasia | High-grade dysplasia |          |
| <i>Ki67 expression (% of positive epithelial cells)</i>      |                                            |                     |                      |          |
| Mild (score 0)                                               | 30 (63.8)                                  | 2 (28.6)            | 0 (0.0)              | 0.001    |
| Moderate (score 1)                                           | 17 (36.2)                                  | 5 (71.4)            | 5 (83.3)             |          |
| Strong (score 2)                                             | 0 (0.0)                                    | 0 (0.0)             | 1 (16.7)             |          |
| <i>Ki67 expression (epithelial distribution)</i>             |                                            |                     |                      |          |
| Restricted to basal third (score 0)                          | 35 (74.5)                                  | 3 (42.9)            | 0 (0.0)              | <0.0001  |
| Above basal third (score 1)                                  | 12 (25.5)                                  | 4 (57.1)            | 6 (100.0)            |          |
| <i>p16 epithelial expression</i>                             |                                            |                     |                      |          |
| Negative (score 0)                                           | 41 (87.2)                                  | 7 (100)             | 4 (66.7)             | 0.218    |
| Positive (score 1)                                           | 6 (12.8)                                   | 0 (0)               | 2 (33.3)             |          |
| <i>DcR2 expression (% of positive epithelial cells)</i>      |                                            |                     |                      |          |
| Mild (score 0)                                               | 44 (93.6)                                  | 4 (57.1)            | 3 (50.0)             | 0.002    |
| Moderate (score 1)                                           | 2 (4.3)                                    | 3 (42.9)            | 5 (50.0)             |          |
| Strong (score 2)                                             | 1 (2.1)                                    | 0 (0.0)             | 0 (0.0)              |          |
| <i>Nuclear DEC1 expression (epithelial distribution)</i>     |                                            |                     |                      |          |
| No expression (score 0)                                      | 6 (13.6)                                   | 1 (14.2)            | 0 (0.0)              | 0.076    |
| Restricted to basal layer (score 1)                          | 27 (61.4)                                  | 3 (42.9)            | 1 (16.7)             |          |
| Suprabasal layer (score 2)                                   | 11 (25.0)                                  | 3 (42.9)            | 5 (83.3)             |          |
| <i>Cytoplasmic DEC1 expression (epithelial distribution)</i> |                                            |                     |                      |          |
| No expression (score 0)                                      | 26 (59.1)                                  | 2 (28.6)            | 2 (33.3)             | 0.005    |
| Restricted to basal layer (score 1)                          | 16 (36.4)                                  | 2 (28.6)            | 1 (16.7)             |          |
| Suprabasal layer (score 2)                                   | 2 (4.5)                                    | 3 (42.9)            | 3 (50.0)             |          |

**Supplementary Table S3.** Antibodies used in the immunohistochemical analysis of protein expression.

| Protein | Primary antibody (manufacturer)      | Antibody Dilution |
|---------|--------------------------------------|-------------------|
| Ki67    | Mouse Monoclonal Clone MIB-1 (Dako)  | Prediluted        |
| p16     | Mouse Monoclonal (CINtec® Histology) | Prediluted        |
| DcR2    | Rabbit Monoclonal (Abcam)            | 1:1000            |
| DEC1    | Rabbit, affinity isolated (Sigma)    | 1:200             |
